# Supplementary material for: The effect of pH and transition metal ions on cysteine-assisted gold aggregation for a distinct colorimetric response
Source: Royal Society of Chemistry journal article supplement (doi:10.1039/d1ra00013f), 2021-01-01
Supplement: d1ra00013f1.pdf [file d1ra00013f1.pdf]

# Supporting Information

for

## The effect of pH and transition metal ions on cysteine-assisted gold aggregation for a distinct colorimetric detection

Trang Thi Thuy Nguyen,<sup>1</sup> Olivia A. Han,<sup>2</sup> Eun Bi Lim,<sup>1</sup> Seungjoo Haam,<sup>3</sup>  
Joon-Seo Park,<sup>2,\*</sup> and Sang-Wha Lee<sup>1,\*</sup>

<sup>1</sup>*Department of Chemical and Biological Engineering, Gachon University, 1342 Seongnamdaero, Sujeong-gu, Seongnam-si, Gyeonggi-do 13120, Republic of Korea*

<sup>2</sup>*Department of Chemistry, Eastern University, 1300 Eagle Road, St. Davids, PA 19087-3696, USA*

<sup>3</sup>*Department of Chemical and Biomolecular Engineering, Yonsei University, 50 Yonsei-ro, Seodaemun-gu, Seoul 03722, Republic of Korea*

\* Corresponding authors: [jpark6@eastern.edu](mailto:jpark6@eastern.edu), [lswha@gc.gachon.ac.kr](mailto:lswha@gc.gachon.ac.kr)

## Instrumental Analysis

AuNPs were characterized for the shape, size, structure, and the optical properties. Scanning electron microscopy (SEM; Hitachi S-4700 FE-SEM; Japan) was used to measure the surface morphology of the samples. Electrophoretic light scattering (Photal Otsuka Electronics, ELS 8000) were used to characterize the particle size distribution and zeta potential. X-ray diffraction (XRD; Rigaku Rint 2200 Series, Rigaku, Tokyo, Japan) using Cu K $\alpha$ 1 radiation of wavelength  $\lambda = 1.5406 \text{ \AA}$ , at 40 kV voltage and 30 mA current with the continuous-scanning  $2\theta$  mode was used to identify the crystalline structure of the samples. The absorption spectra of the sample solution with and without Cys were analyzed using UV-Visible spectrophotometer (Shimadzu, Model-UV-3600).

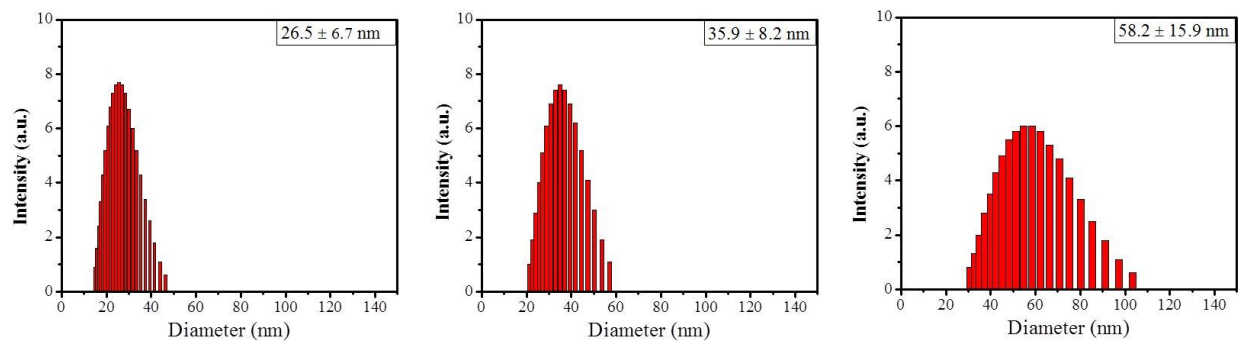

**Fig. S1.** Particle size distribution of AuNPs prepared at the different molar ratios of citrate/Au<sup>3+</sup> according to DLS method: (a) citrate/Au<sup>3+</sup> = 5:1, (b) citrate/Au<sup>3+</sup> = 3:1, (c) citrate/Au<sup>3+</sup> = 0.5:1.

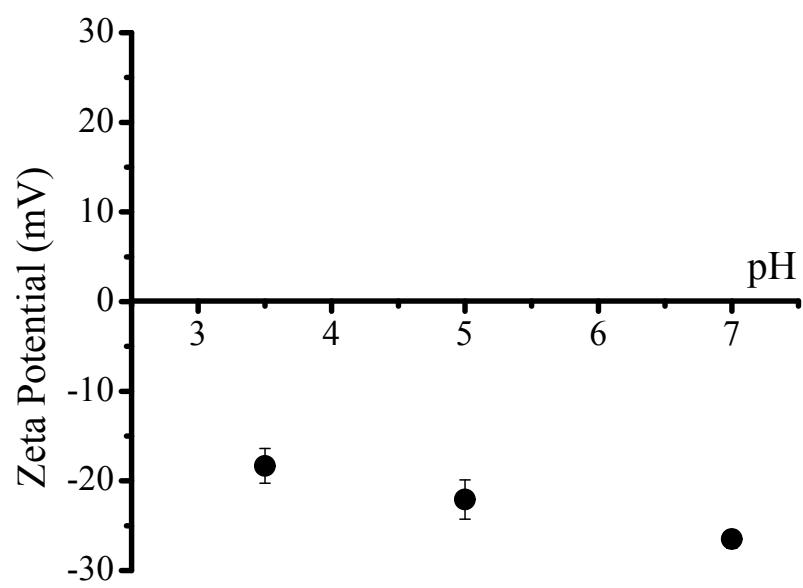

**Fig. S2.** Zeta potential of AuNPs (26.5 nm) at different pHs.

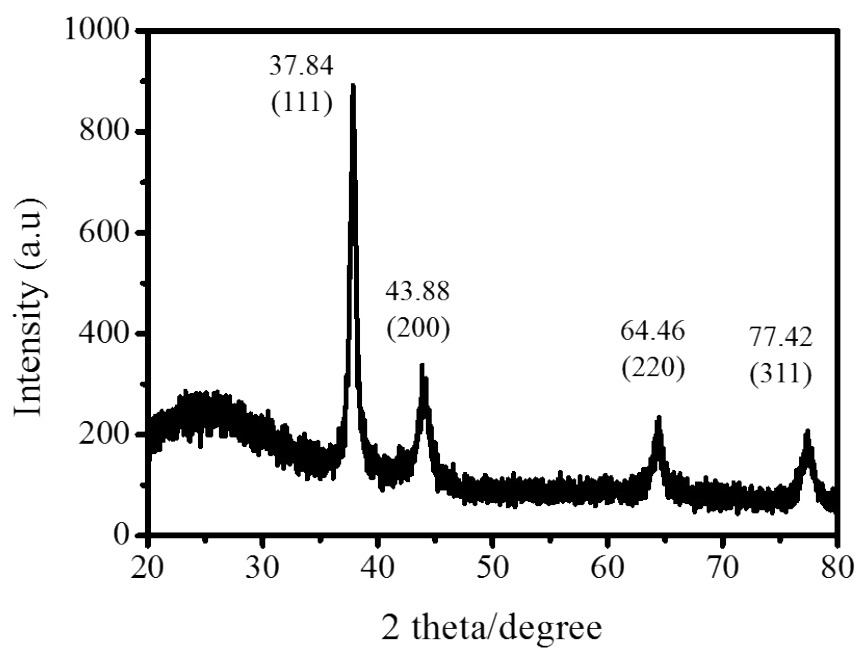

**Fig. S3.** XRD patterns of AuNPs (26.5 nm).

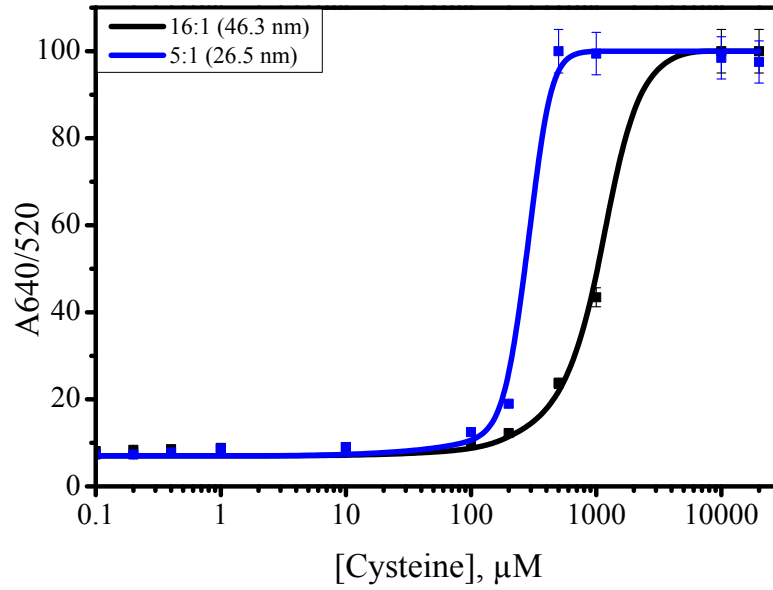

**Fig. S4.** Effect of Cys concentration on the absorbance ratio at 640/520 (nm/nm) for the same surface area of AuNPs prepared with 5:1 and 16:1 citrate-to-gold ratios that are corresponding to  $\sim 10^{11}/\text{mL}$  and  $2.809 \times 10^{10}/\text{mL}$ , respectively.

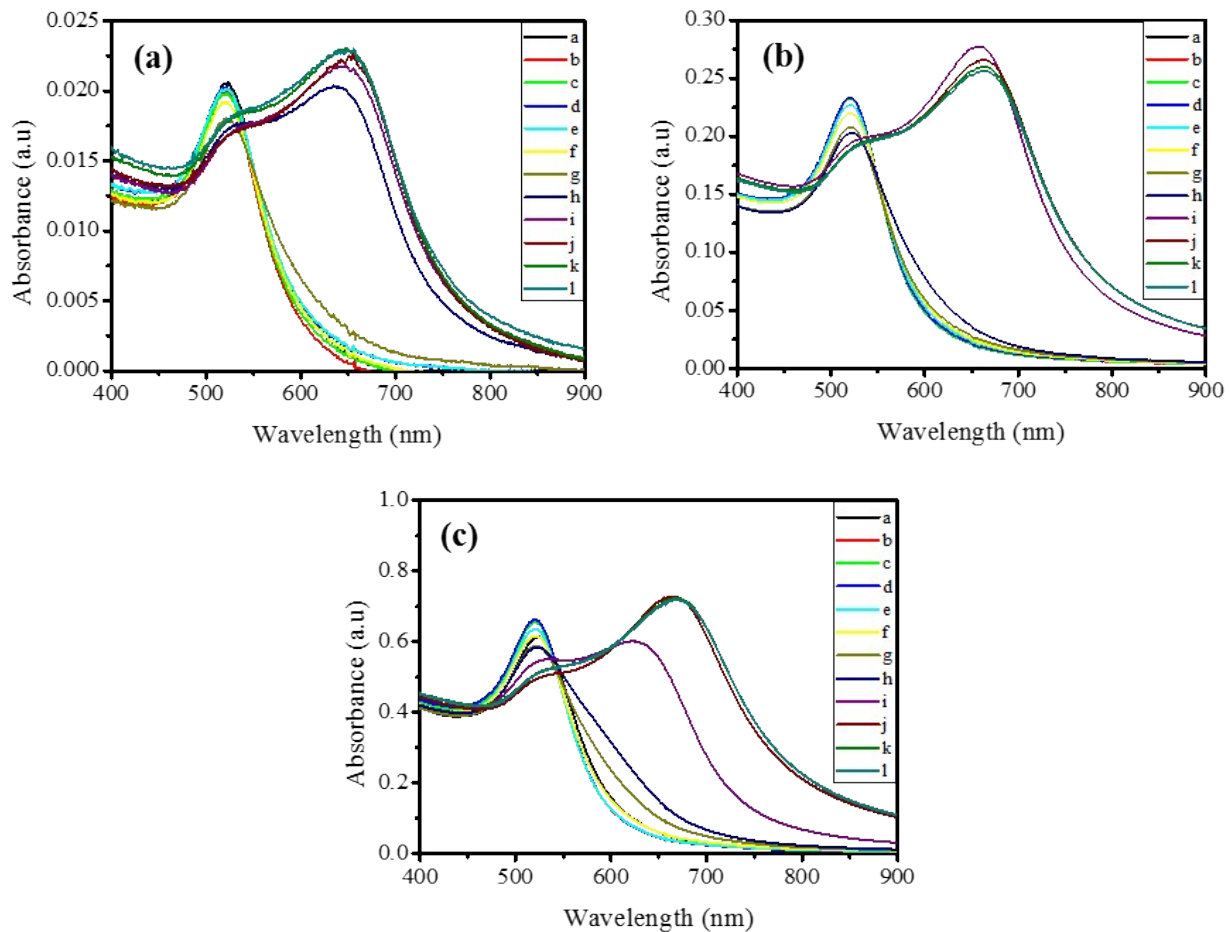

**Fig. S5.** UV-vis spectra of 26.5 nm AuNPs prepared with 5:1 citrate/Au<sup>3+</sup> molar ratio in response to different concentrations of Cys (0  $\mu\text{M}$ , 0.1  $\mu\text{M}$ , 0.2  $\mu\text{M}$ , 0.4  $\mu\text{M}$ , 1  $\mu\text{M}$ , 10  $\mu\text{M}$ , 100  $\mu\text{M}$ , 200  $\mu\text{M}$ , 500  $\mu\text{M}$ , 1000  $\mu\text{M}$ , 10000  $\mu\text{M}$ , 20000  $\mu\text{M}$ ) from a to l: (a)  $10^{10}$  particles/mL (b)  $10^{11}$  particles/mL (c)  $3 \times 10^{11}$  particles/mL.

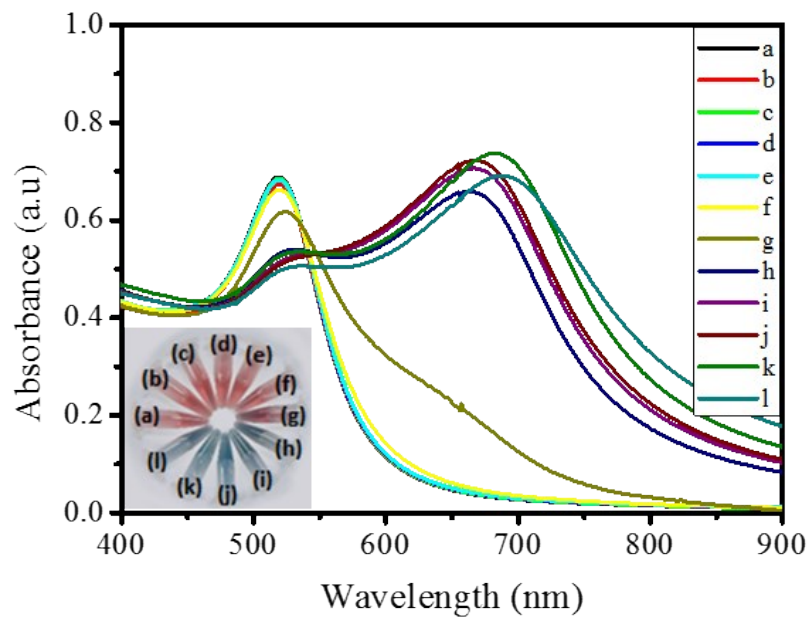

**Fig. S6.** UV-vis spectra of the 26.5 nm AuNPs prepared with 5:1 citrate/Au<sup>3+</sup> molar ratio in response to different concentrations of cysteine (0 μM, 0.1 μM, 0.2 μM, 0.4 μM, 1 μM, 10 μM, 100 μM, 200 μM, 500 μM, 1000 μM, 10000 μM, 20000 μM) from a to l in the presence of 0.1 mM Cu<sup>2+</sup>. The inset shows the photograph of these AuNPs.

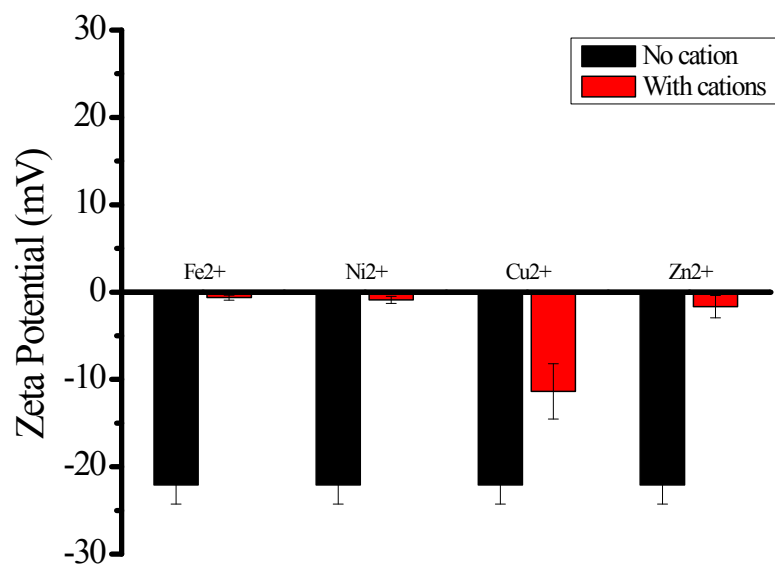

**Fig. S7.** Zeta potential of AuNPs in the presence of various metal cations at 1.0 mM in acidic condition (pH 5): No cation, Fe<sup>2+</sup>, Ni<sup>2+</sup>, Cu<sup>2+</sup>, and Zn<sup>2+</sup>.



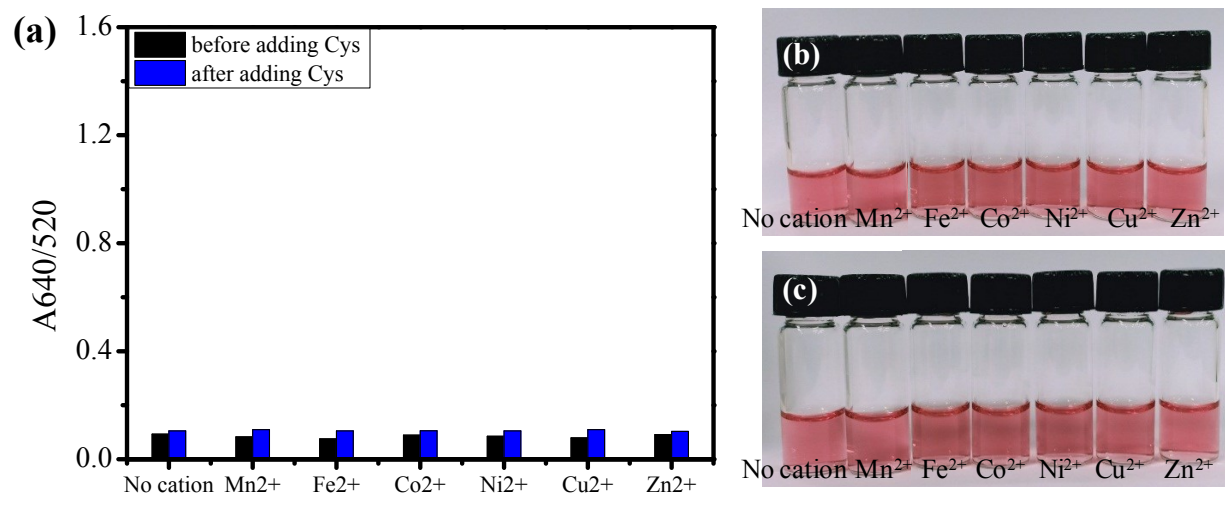

**Fig. S8.** The absorbance ratio of A640/520 in the presence of transition metal ions at 0.1 mM before and after adding 1.5  $\mu$ M Cys at pH 5 (a). The photograph of AuNPs solution before (b) and after adding Cys (c) with various cations (0.1 mM): No cation, Mn<sup>2+</sup>, Fe<sup>2+</sup>, Co<sup>2+</sup>, Ni<sup>2+</sup>, Cu<sup>2+</sup>, and Zn<sup>2+</sup>.
